# Supplementary material for: Implementing Rounding Checklists in a Pediatric Oncologic Intensive Care Unit
Source: MDPI journal article supplement (doi:10.3390/children9040580), 2022-04-18
Supplement: s1 [file s1]

## Article

# Implementing Rounding Checklists in a Pediatric Oncologic Intensive Care Unit

Gardner MK<sup>1</sup>, Amado PJ<sup>1</sup>, Baig MU<sup>2</sup>, Mohiuddin S<sup>2</sup>, Harden A<sup>2</sup>, Ewing LJ<sup>3</sup>, Razvi S<sup>3</sup>, Cortes JA<sup>3</sup>, Mejia R<sup>3</sup>, Petropoulos D<sup>4</sup>, Tewari P<sup>4</sup> and Ahmad AH<sup>3\*</sup>.

<sup>1</sup> Pediatric Critical Care, Division of Nursing, The University of Texas MD Anderson Cancer Center, Houston, TX 77030, USA

<sup>2</sup> Pediatric Oncology Fellowship Program, Department of Pediatrics, The University of Texas MD Anderson Cancer Center, Houston, TX, 77030, USA

<sup>3</sup> Section of Pediatric Critical Care, Department of Pediatrics, The University of Texas MD Anderson Cancer Center, Houston, TX 77030, USA

<sup>4</sup> Section of Pediatric Stem Cell Transplantation and Cellular Therapy, Department of Pediatrics, The University of Texas MD Anderson Cancer Center, Houston, TX, 77030, USA

\* Correspondence: ahahmad@mdanderson.org

**Supplemental figures:** Central line associated blood stream infection (CLABSI), catheter associated urinary tract infection (CAUTI), and ventilator associated pneumonia (VAP) data

Supplemental Figures S1–S3 CLABSI, CAUTI and VAP results. There were 1222 central line days, 312 urinary catheter days, and 123 ventilator days in our pediatric oncologic ICU during this time period. We sustained a rate of zero for CLABSI, CAUTI and VAP during the 12-month period prior to, during and post-intervention (October 2019–September 2020).

**Citation:** Gardner, M.K.; Amado, P.J.; Baig, M.U.; Mohiuddin, S.; Harden, A.; Ewing, L.J.; Razvi, S.; Cortes, J.A.; Mejia, R.; Petropoulos, D.; Tewari, P.; Ahmad, A.H. Implementing Rounding Checklists in a Pediatric Oncologic Intensive Care Unit. *Children* **2022**, *9*, 580. <https://doi.org/10.3390/children9040580>

Academic Editor: Mara Leimanis Laurens

Received: 20 February 2022

Accepted: 12 April 2022

Published: 18 April 2022

**Publisher's Note:** MDPI stays neutral with regard to jurisdictional claims in published maps and institutional affiliations.

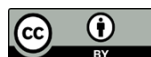

**Copyright:** © 2022 by the authors. Licensee MDPI, Basel, Switzerland. This article is an open access article distributed under the terms and conditions of the Creative Commons Attribution (CC BY) license (<https://creativecommons.org/licenses/by/4.0/>).

## Supplemental Figure S1. CLABSI Data.

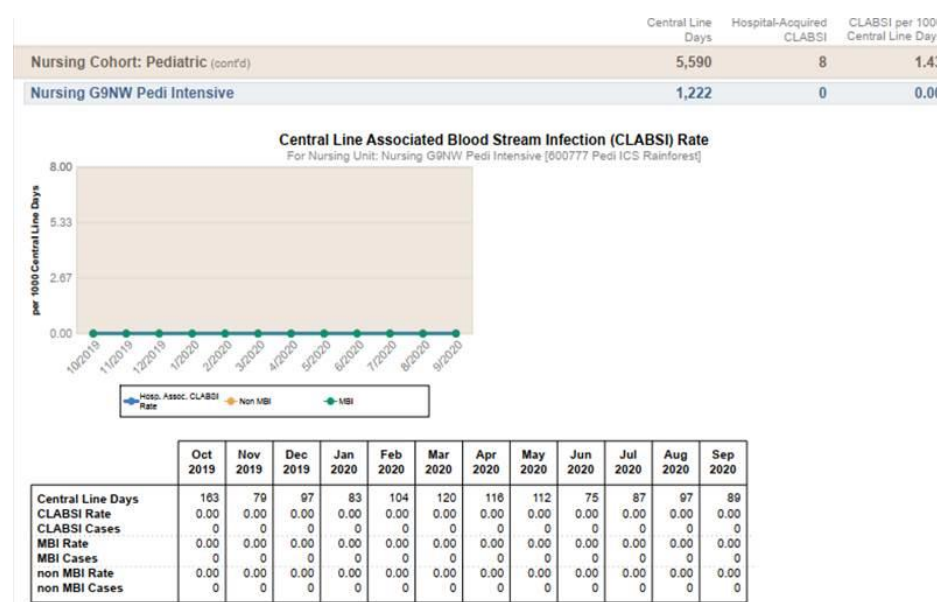

**Supplemental Figure S2. CAUTI Data.**

| Hospital-Acquired Catheter-Associated Urinary Tract Infections - 10/1/2019 to 9/30/2020 | Urinary Catheter Days | Hospital-Acquired CAUTI | Hosp-Acquired CAUTI per 1000 Urinary Catheter Days |
|-----------------------------------------------------------------------------------------|-----------------------|-------------------------|----------------------------------------------------|
| <b>Nursing Cohort: Pediatric (cont'd)</b>                                               | <b>541</b>            | <b>0</b>                | <b>0.00</b>                                        |
| <b>Nursing G9NW PEDI Intensive</b>                                                      | <b>312</b>            | <b>0</b>                | <b>0.00</b>                                        |

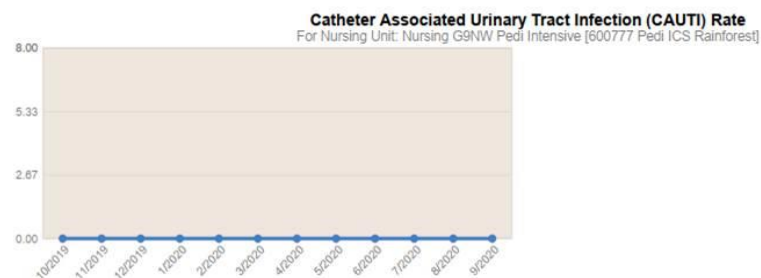[illegible]

**Supplemental Figure S3. VAP Data.**

|                                  | Vent Days  | Pediatric<br>Hosp-Acquired VAP<br>per 1000 Vent Days |
|----------------------------------|------------|------------------------------------------------------|
| <b>Nursing Cohort: Pediatric</b> | <b>123</b> | <b>0</b>                                             |

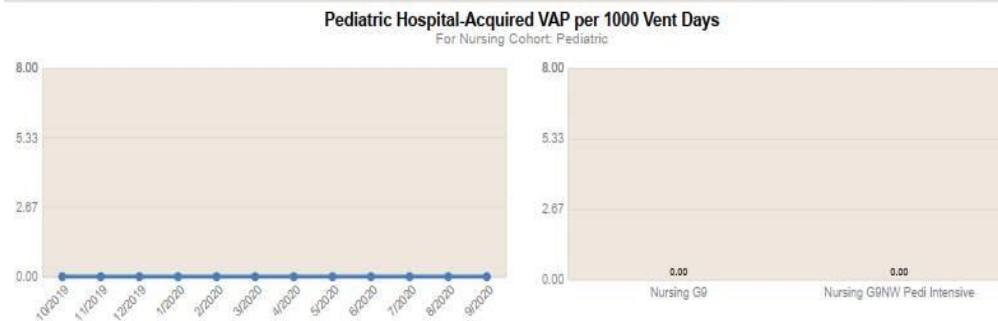[illegible]
